# Supplementary material
Source: publisher figshare collection journal article supplement (https://tandf.figshare.com/ndownloader/files/31079778)
Supplement: Supplementary file 1 [file 31079778]

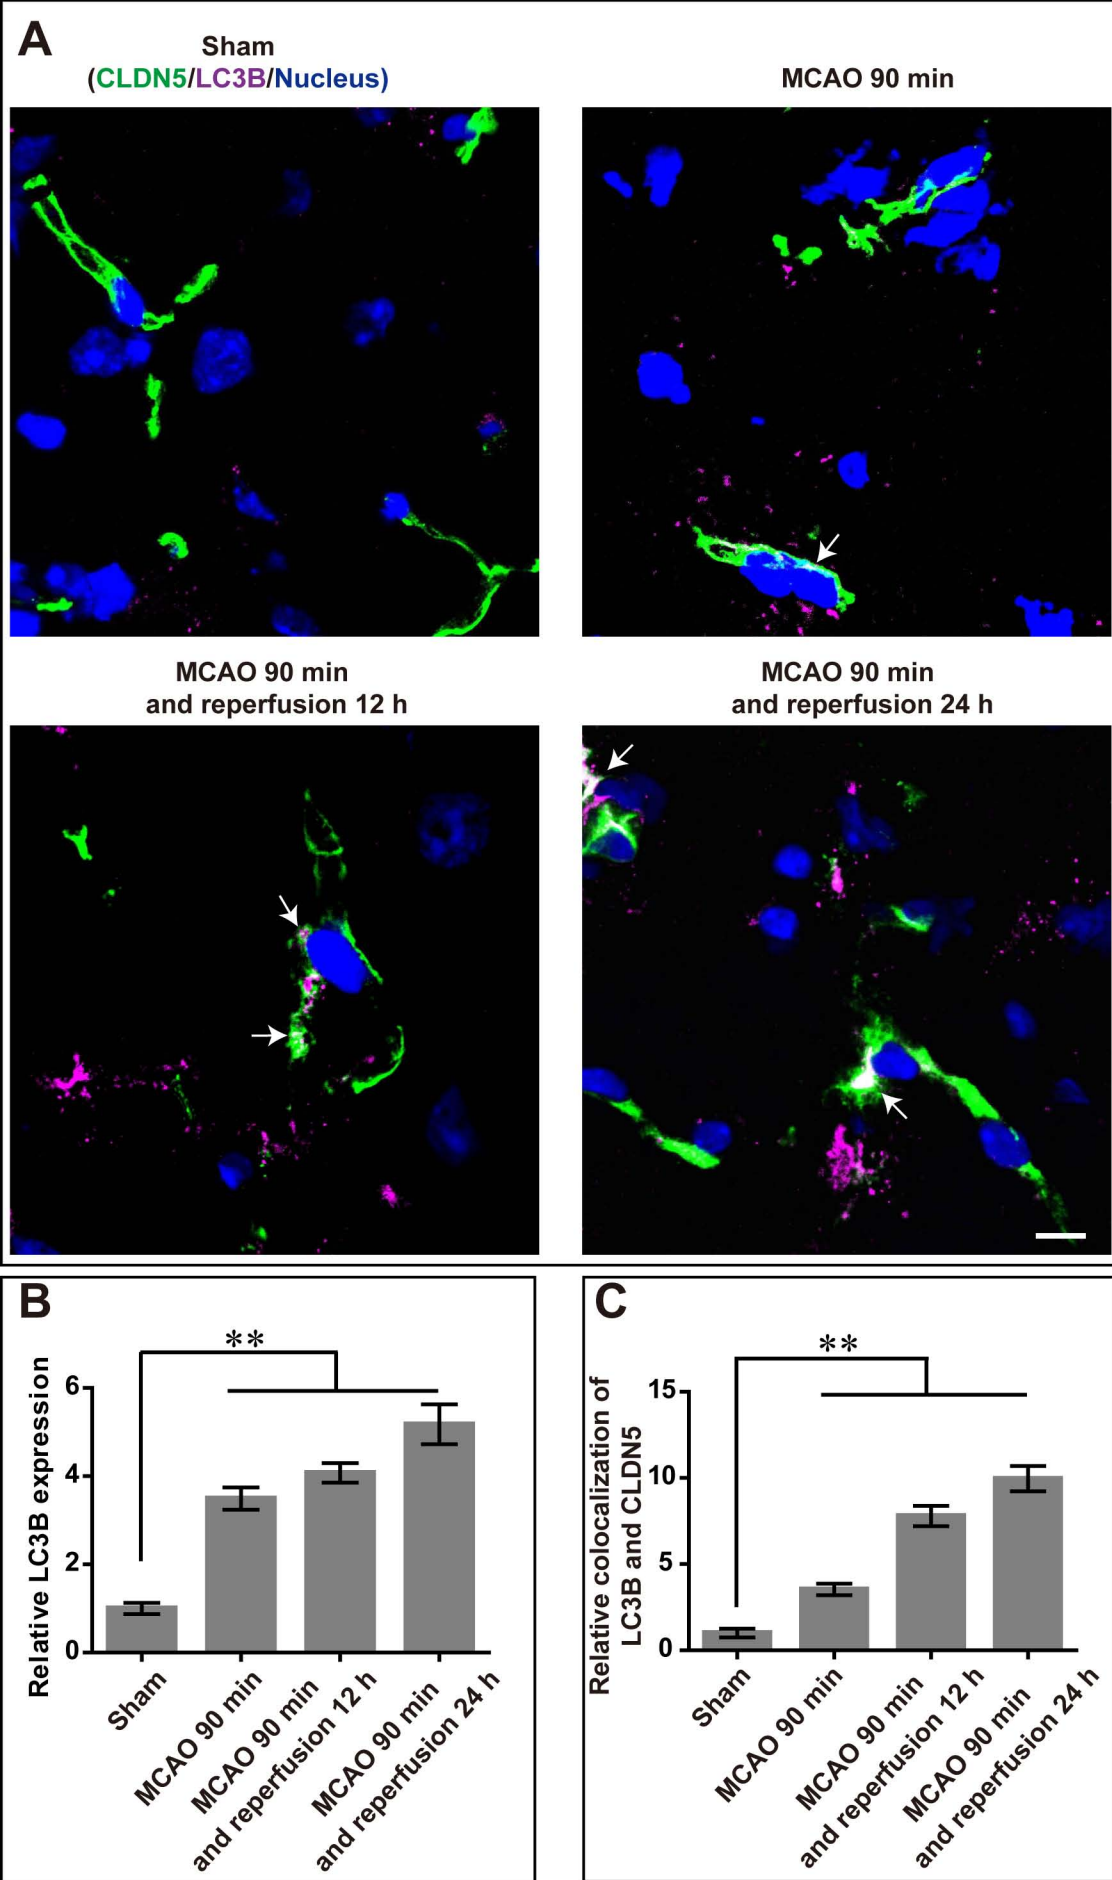

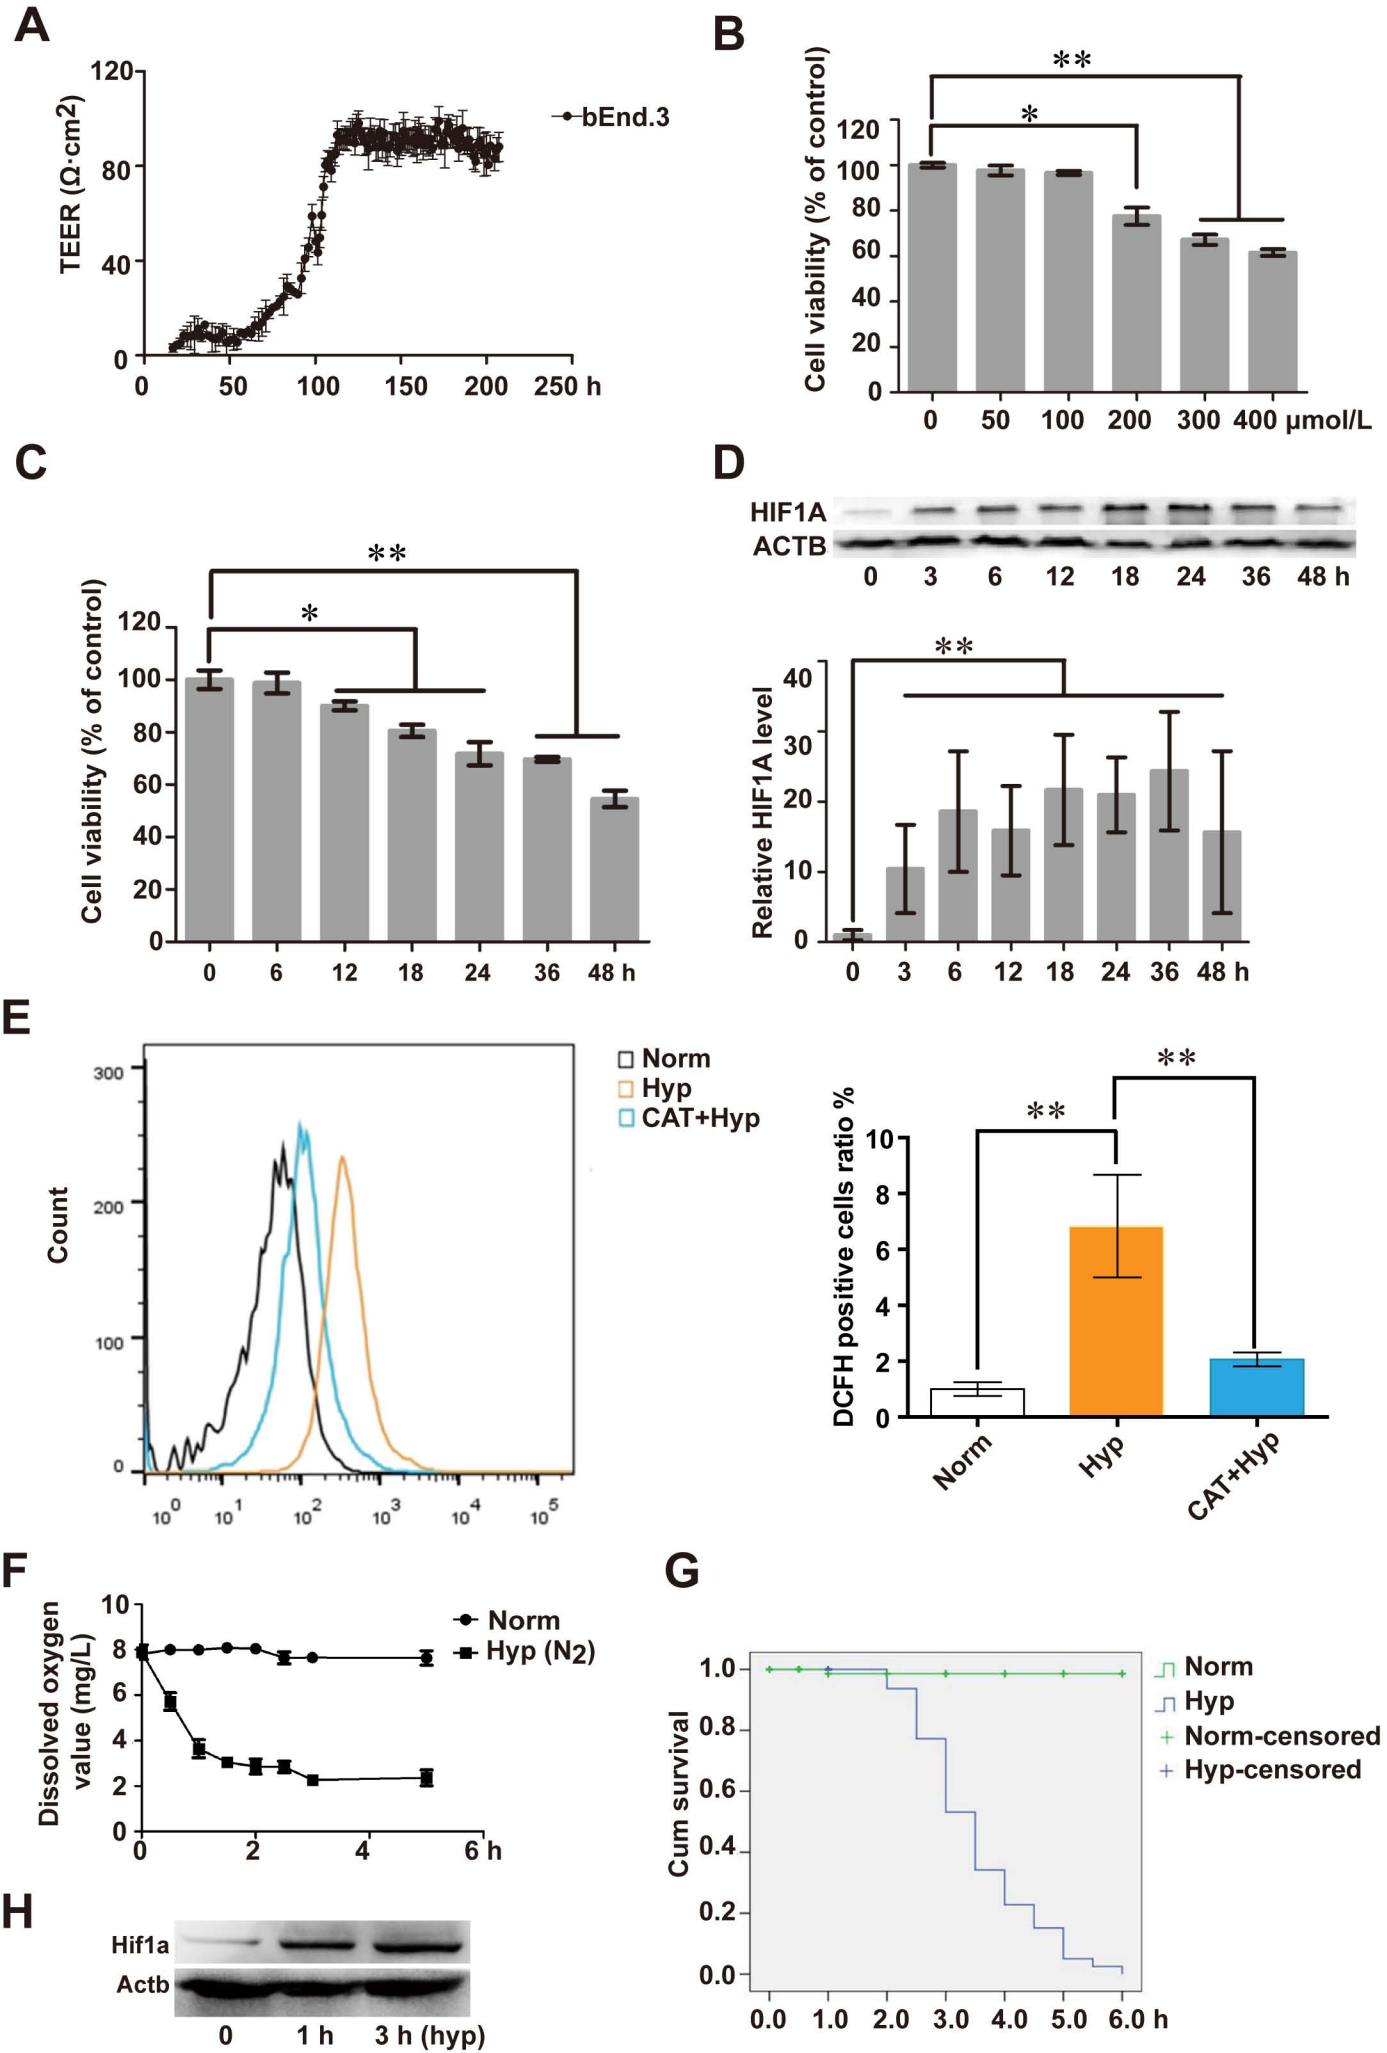

Supplementary Figure 2

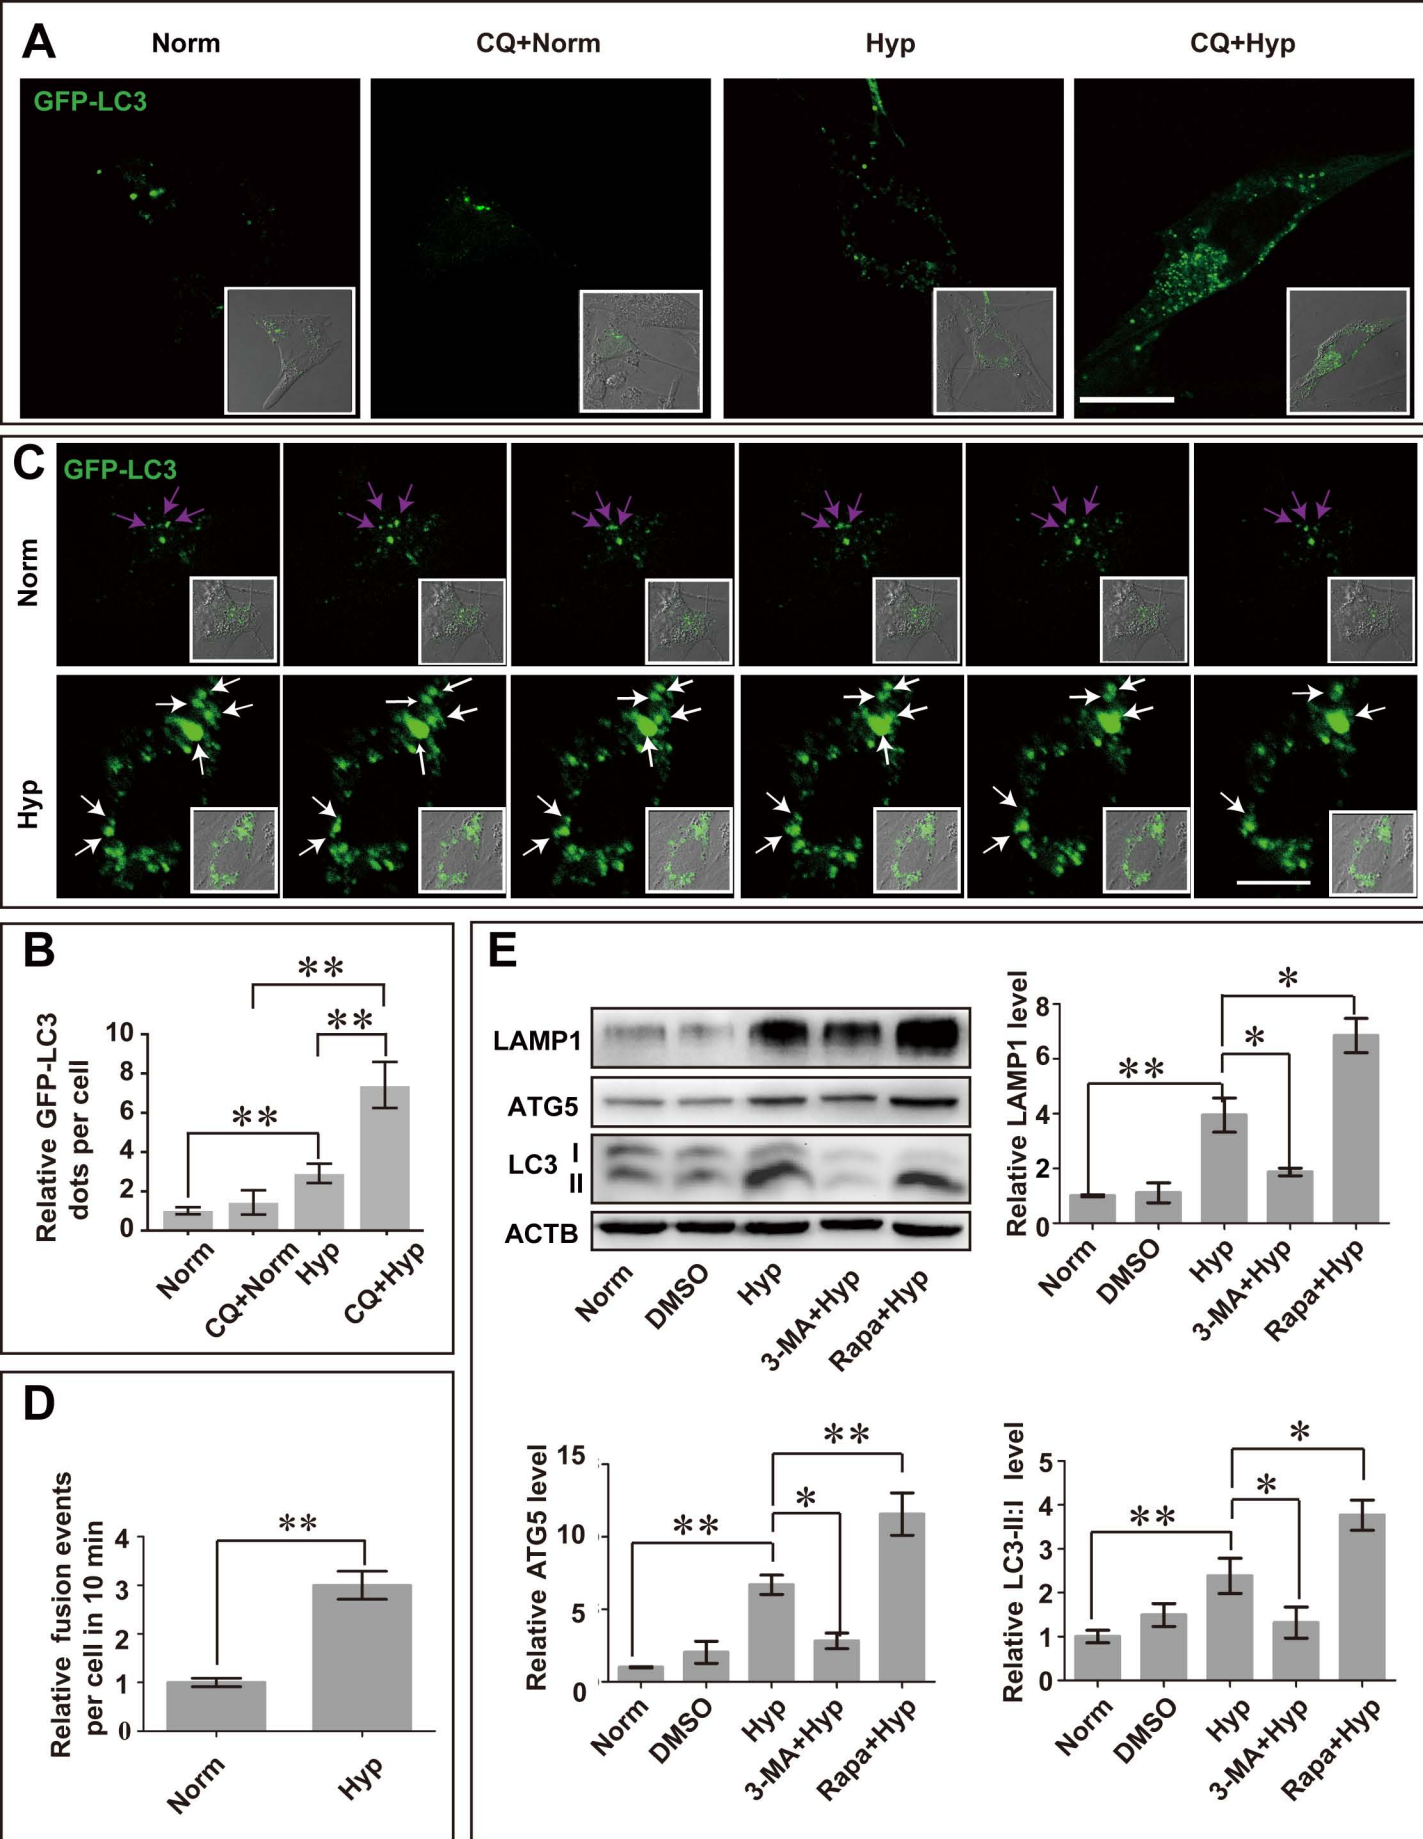



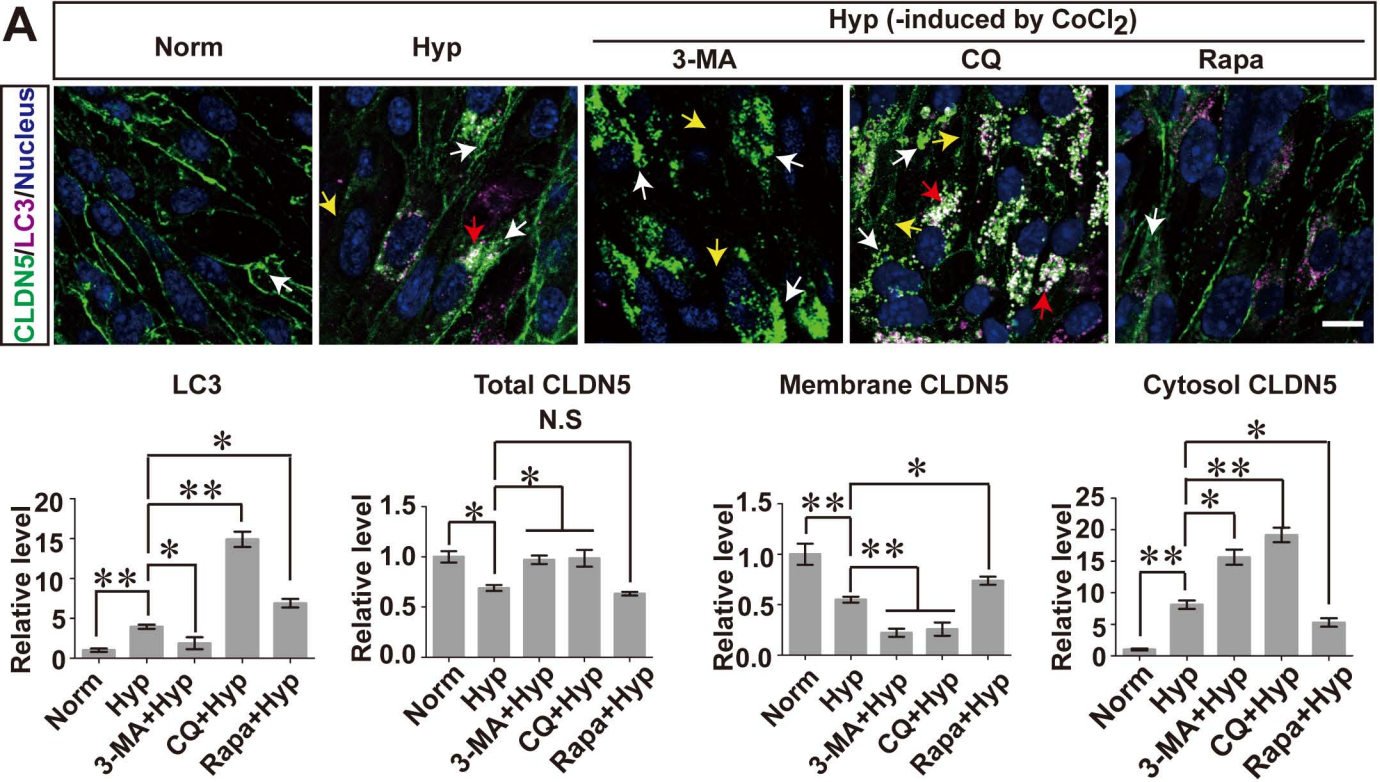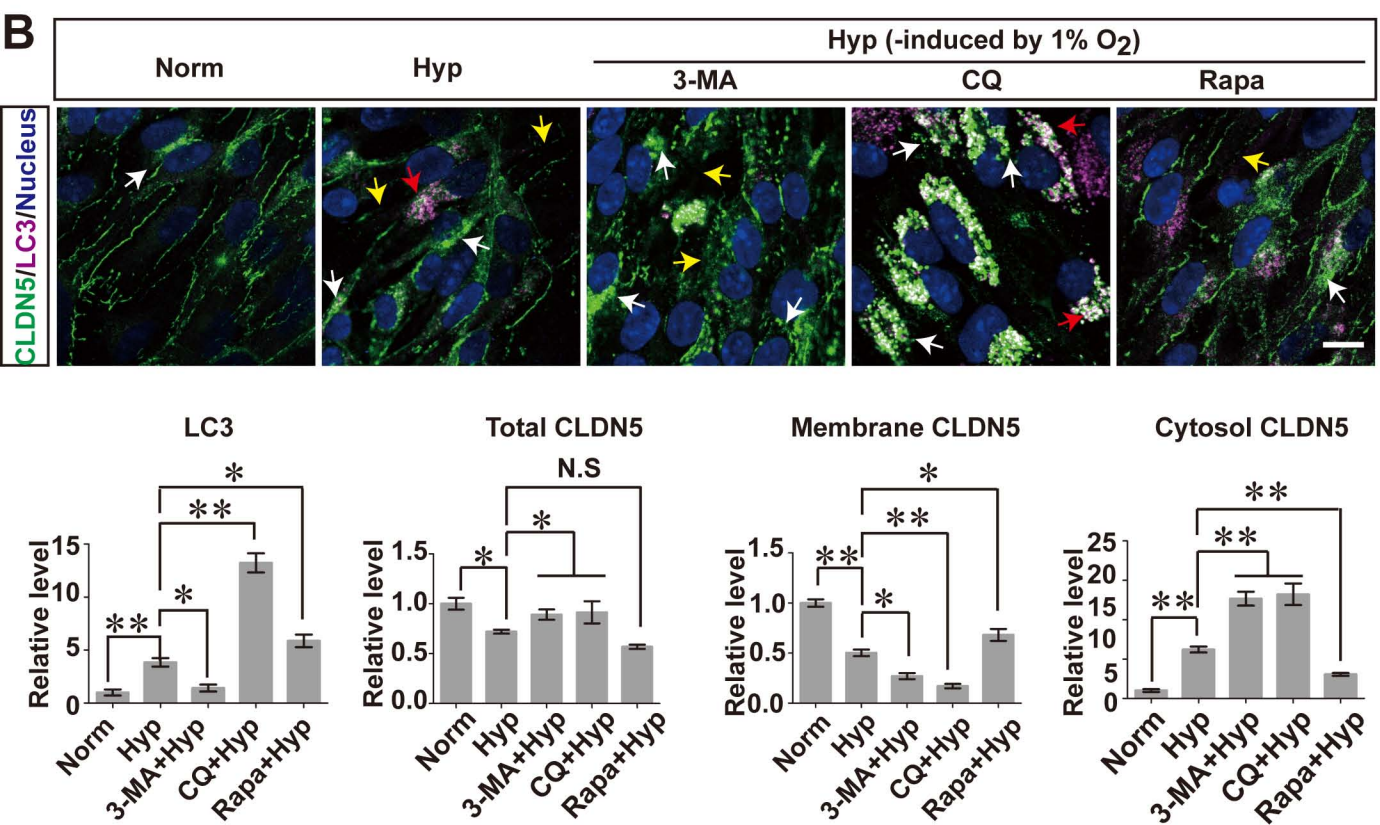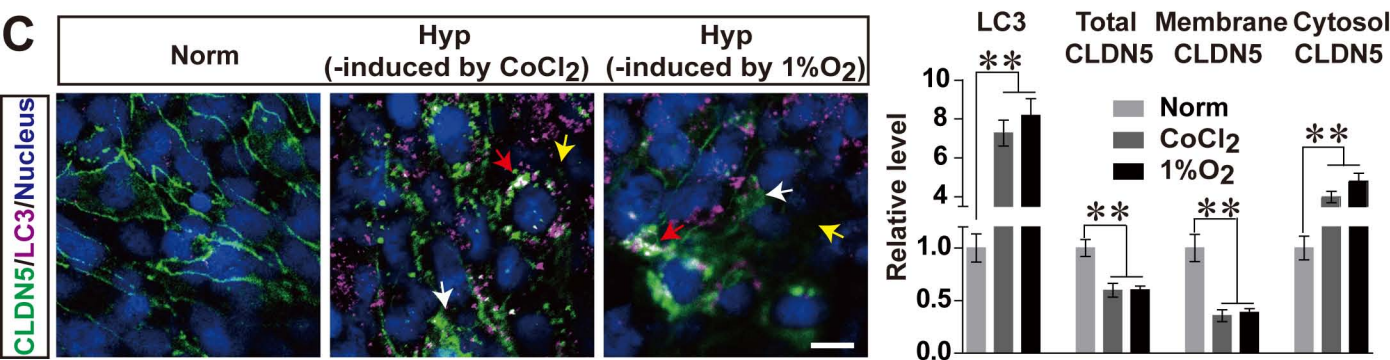

Supplementary Figure 4

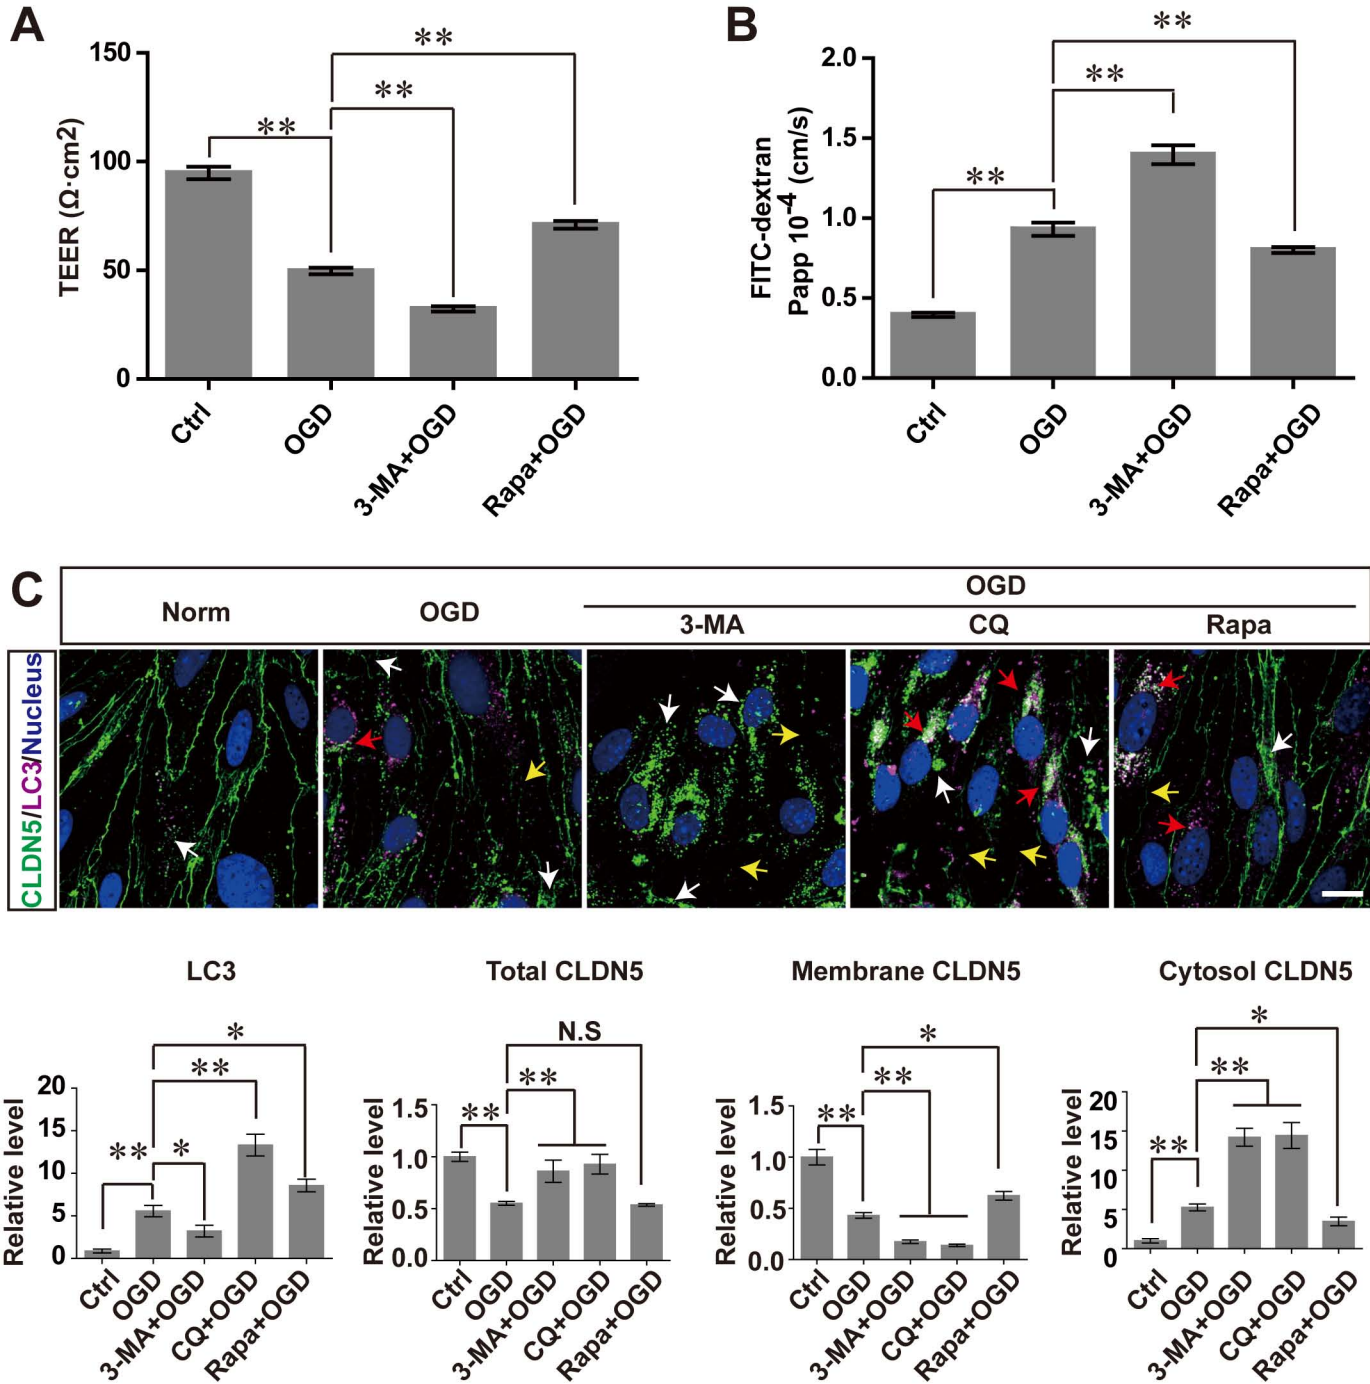

Supplementary Figure 5



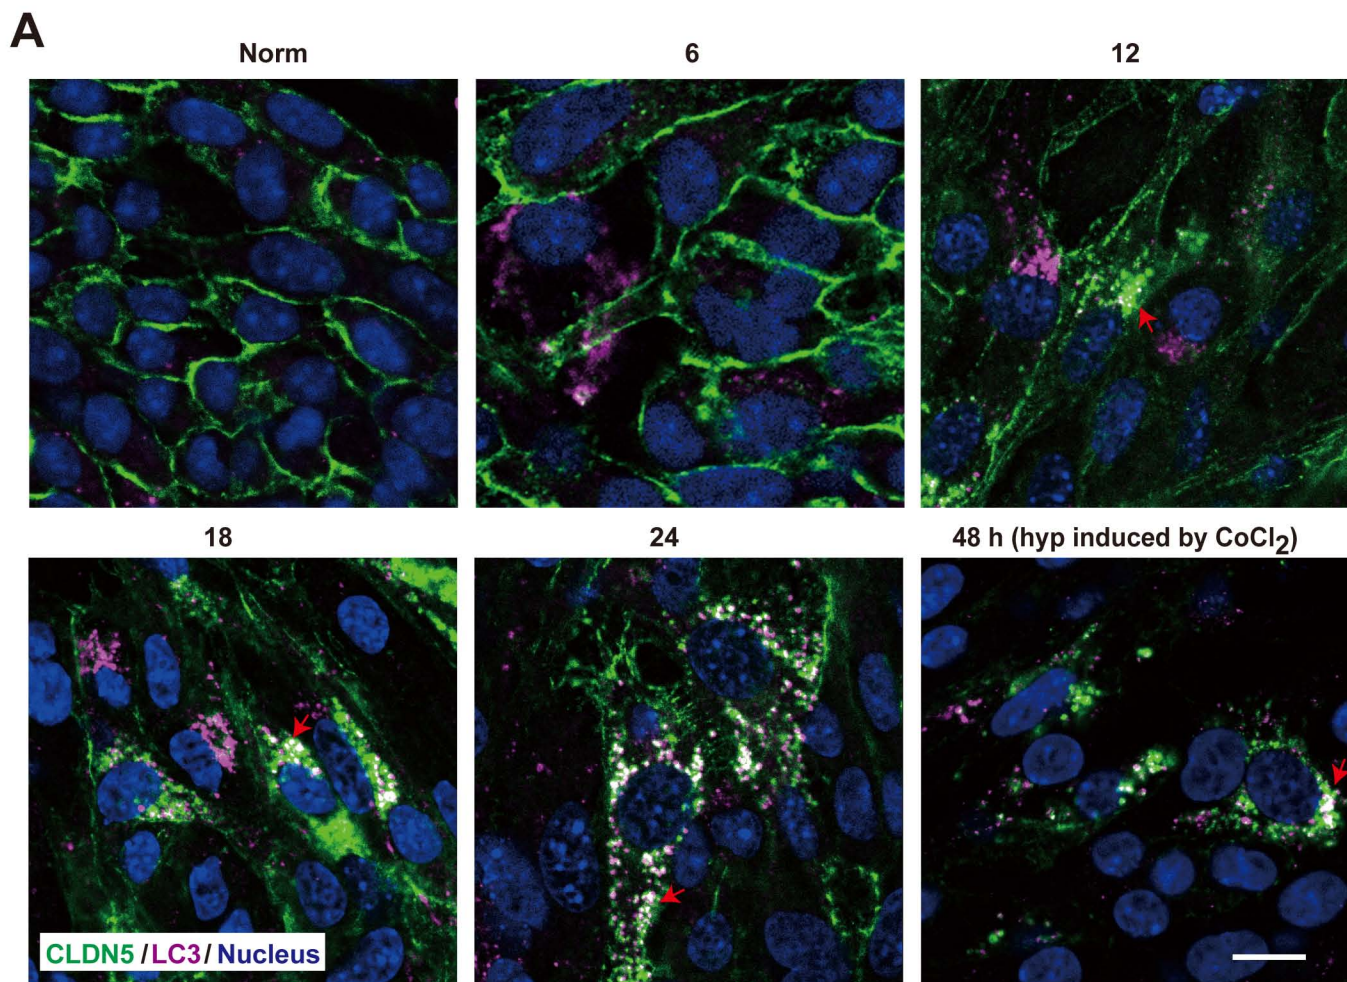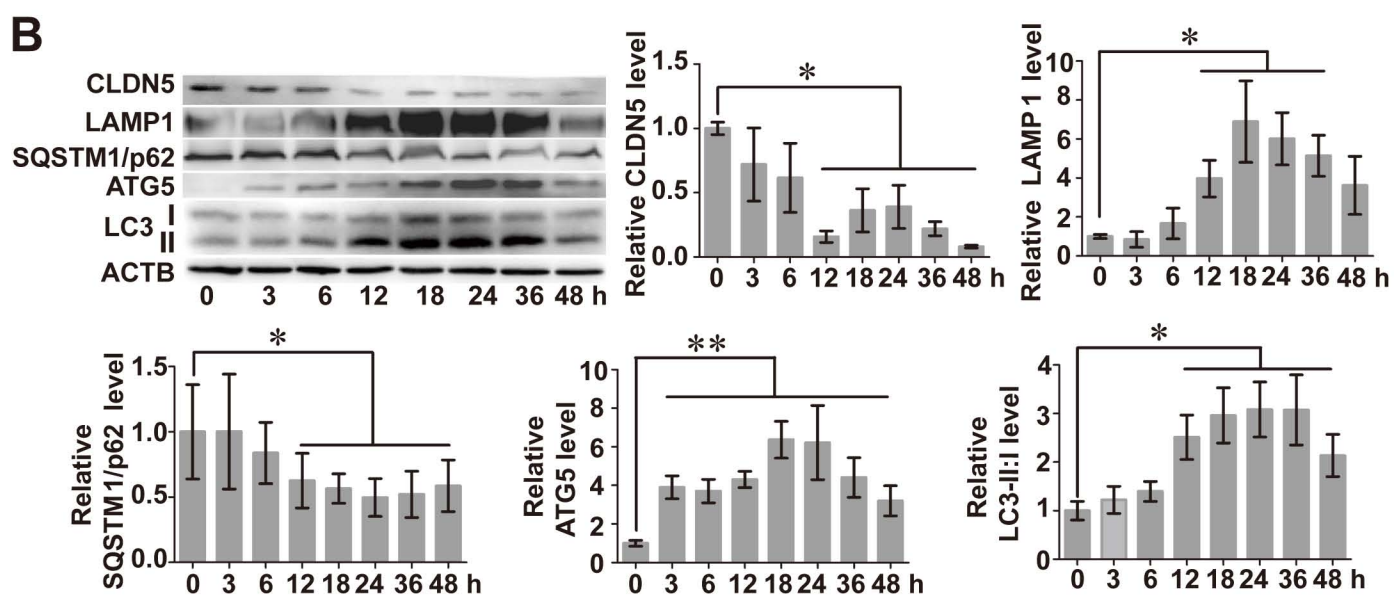

Supplementary Figure 6

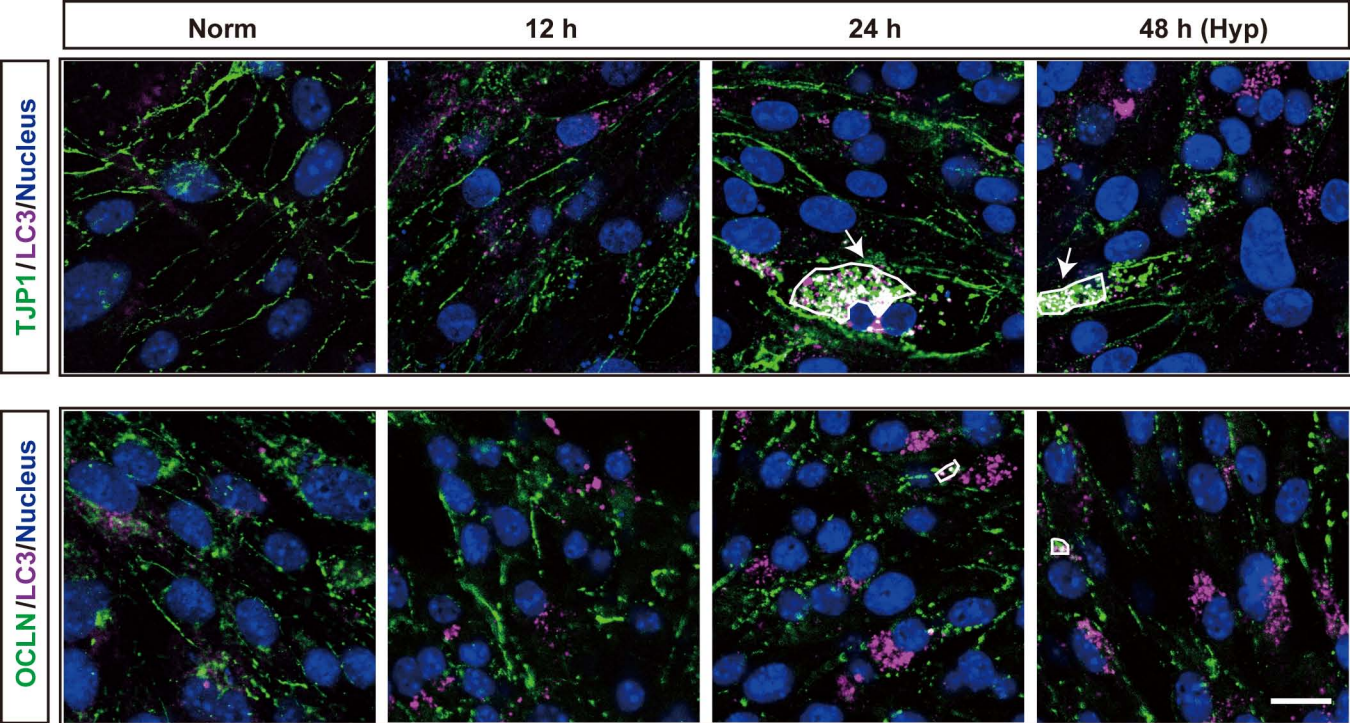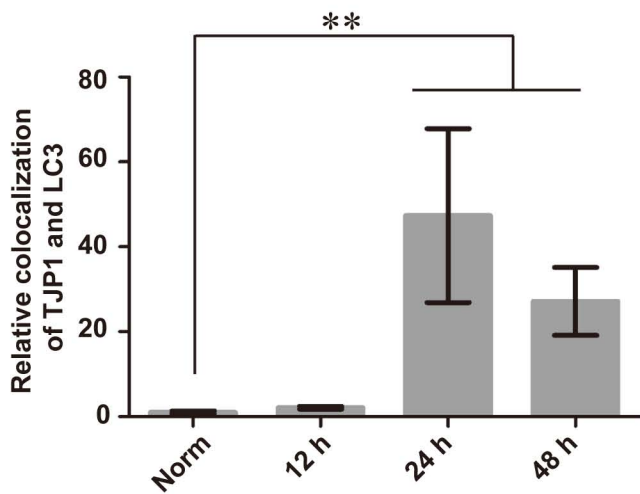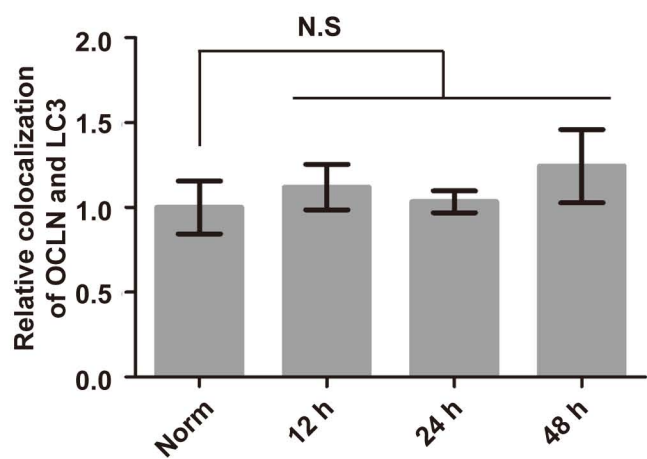

**Supplementary Figure 7**

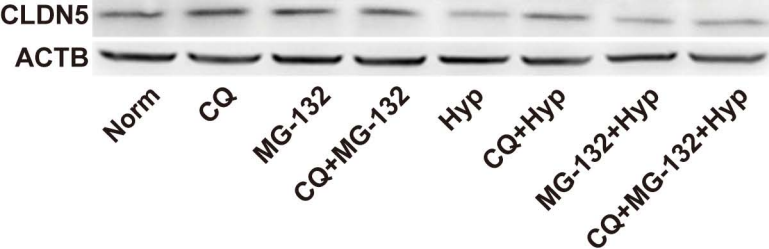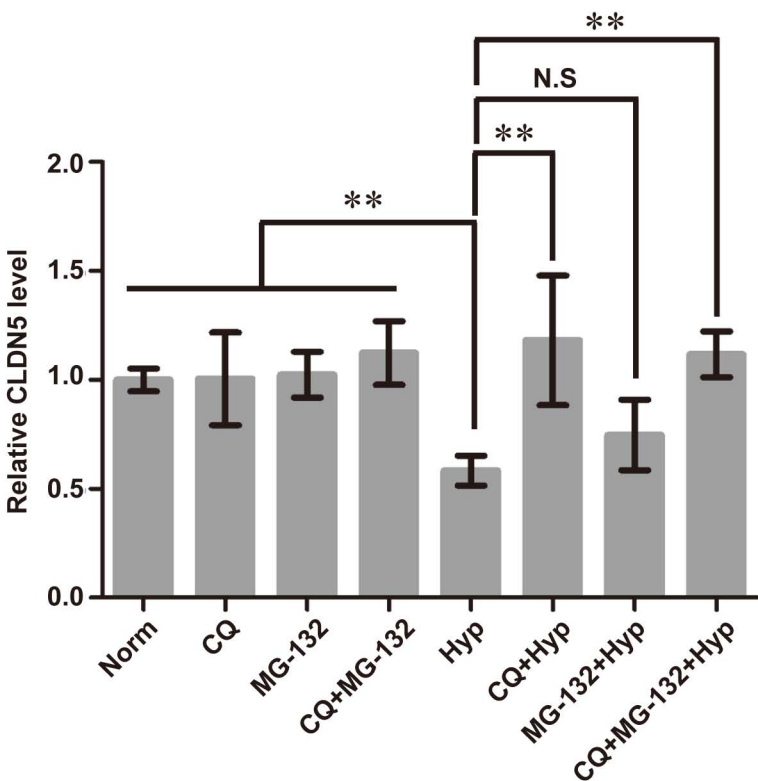

Supplementary Figure 8



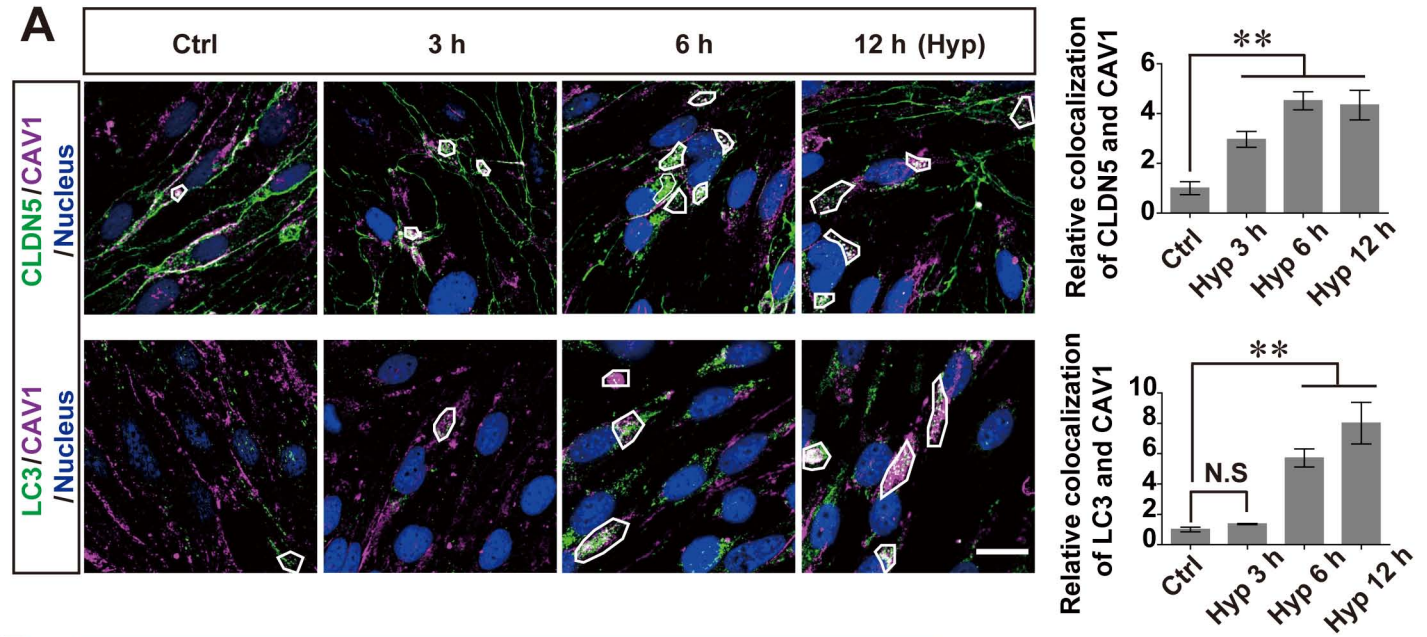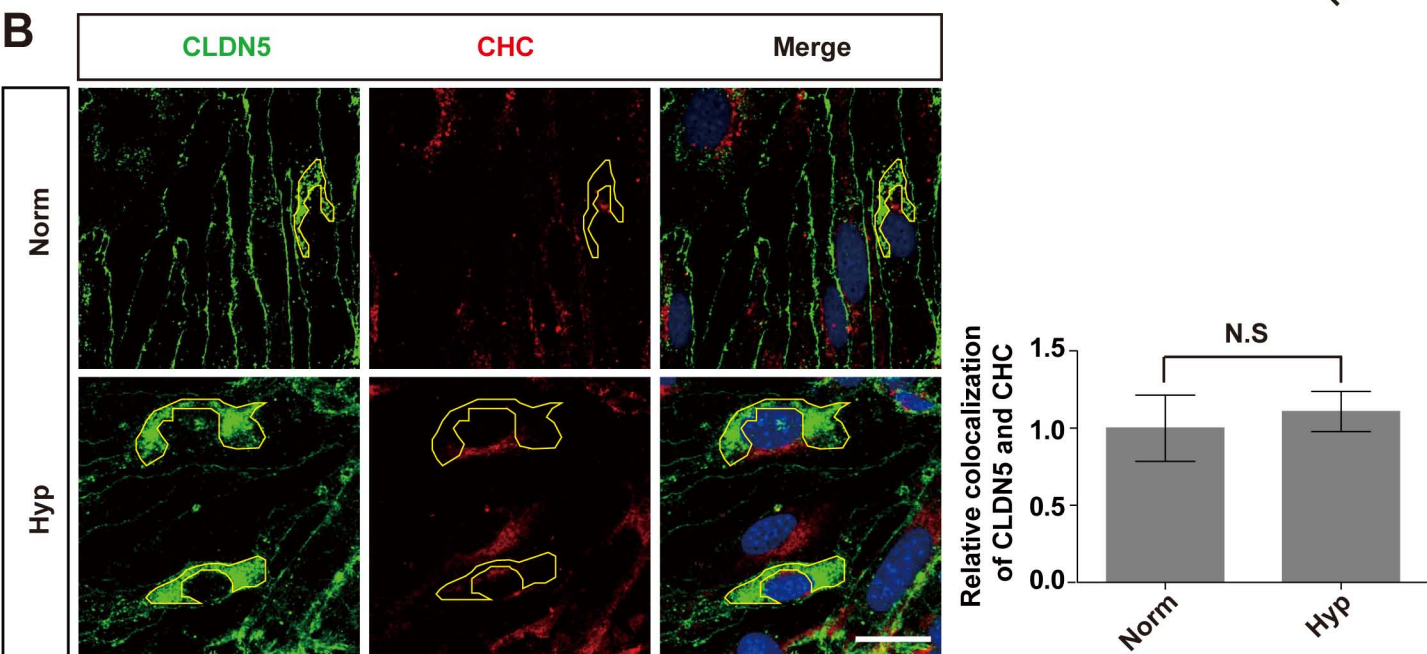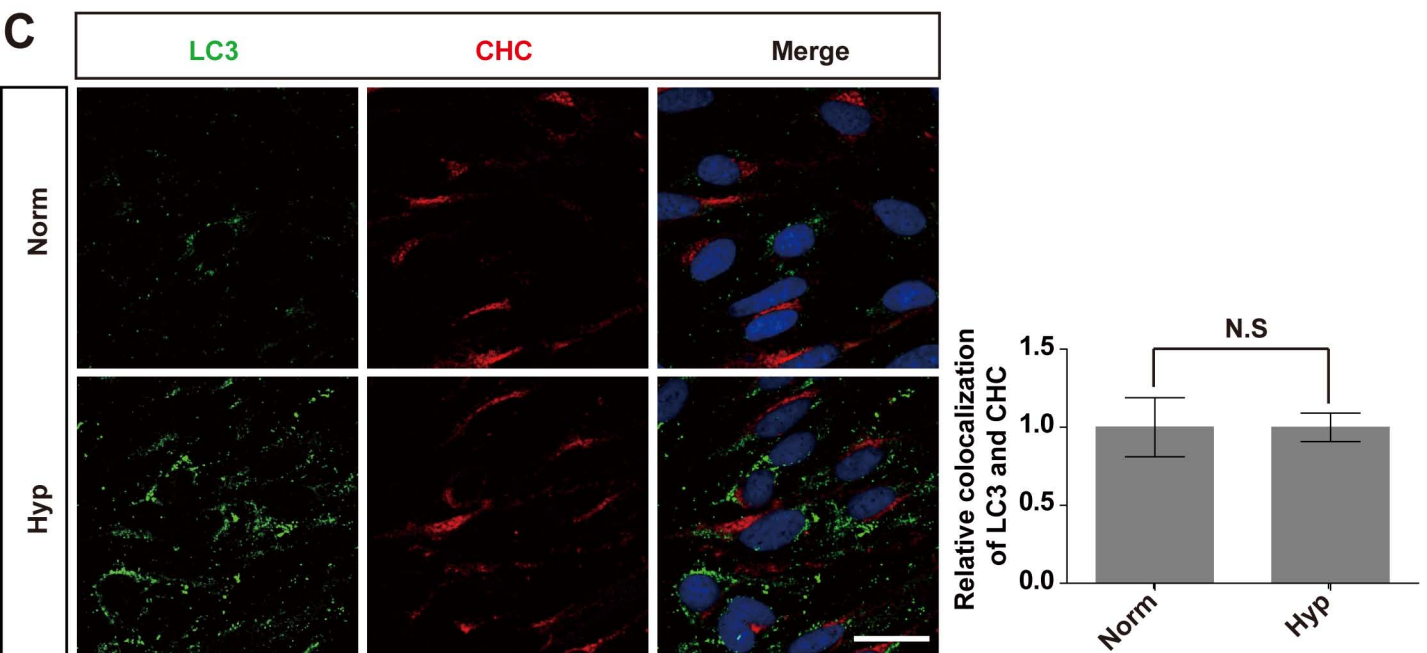

Supplementary Figure 9
